# Supplementary material for: Identification of runoff formation with two dyes in a mid-latitude mountain headwater
Source: Copernicus journal article supplement (doi:10.5194/hess-21-3025-2017), 2017-06-23
Supplement: Supplementary file 1 [file hess-21-3025-2017-supplement.pdf]

Supplement of Hydrol. Earth Syst. Sci., 21, 3025–3040, 2017  
<https://doi.org/10.5194/hess-21-3025-2017-supplement>  
© Author(s) 2017. This work is distributed under  
the Creative Commons Attribution 3.0 License.

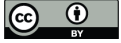

*Supplement of*

## **Identification of runoff formation with two dyes in a mid-latitude mountain headwater**

**Lukáš Vlček et al.**

*Correspondence to:* Philipp Schneider ([philipp.schneider@geo.uzh.ch](mailto:philipp.schneider@geo.uzh.ch))

The copyright of individual parts of the supplement might differ from the CC BY 3.0 License.

**Tab. S1** Overview of research questions, hypotheses and their rationales for the Rokytká headwater.

| Podzol (PZ2)             |            |                                                                                                 |          |                             | Peat Bog (PB3)                                                                                          |          |                              |
|--------------------------|------------|-------------------------------------------------------------------------------------------------|----------|-----------------------------|---------------------------------------------------------------------------------------------------------|----------|------------------------------|
| Topic                    | Process    | Statement                                                                                       | Expected | Result                      | Statement                                                                                               | Expected | Result                       |
| Runoff Formation         | no HOF     | no significant infiltration resistance                                                          | likely   | <b>confirmed</b>            | no significant infiltration resistance                                                                  | likely   | <b>confirmed</b>             |
|                          | SOF1, SSF1 | lateral SOF and/or biomat flow                                                                  | possible | <b>confirmed</b>            | lateral SOF and/or biomat flow                                                                          | likely   | <b>confirmed</b>             |
|                          | SSF2, SSF3 | lateral pipeflow/lateral matrix flow                                                            | possible | <b>rejected / confirmed</b> | lateral pipeflow/lateral matrix flow                                                                    | possible | <b>confirmed / confirmed</b> |
|                          | no GWR     | no phreatic zone in soil and negligible lateral flow in deeper soil horizons                    | likely   | <b>confirmed</b>            | transmissivity feedback (possible rain-on-snow, large storms)                                           | possible | not proven                   |
|                          | DP         | deep percolation to bedrock aquifer                                                             | likely   | not proven                  | not connected – vertically                                                                              | unlikely | <b>confirmed</b>             |
|                          | GWR        | bedrock aquifer/phreatic zone: lateral GW flow in bedrock fissures                              | likely   | not proven                  | not connected – laterally                                                                               | likely   | <b>confirmed</b>             |
| Sodium-Fluorescein (FLC) | -          | Suitable tracer for mineral soils (low pH controlled/buffered by NaOH)                          | likely   | <b>confirmed</b>            | Suitable tracer for mineral soils (low pH controlled/buffered by NaOH)                                  | likely   | <b>rejected</b>              |
|                          | HOF/SOF    | dye identifies surface flow or lateral near-surface flow (biomat flow, Gerke et al. 2009, 2014) | likely   | <b>confirmed</b>            | dye identifies surface flow or lateral near-surface flow (biomat flow, Gerke et al. 2009, 2014)         | likely   | <b>rejected</b>              |
|                          | SSF/GWR    | FLC detects hydrological connectivity between irrigation test plot and spring or stream         | possible | not proven                  | dye detects hydrological connectivity between irrigation test plot and spring or stream                 | possible | not proven                   |
|                          | no GWR     | if detectable, dye identified in vadose zone (soil staining) and flowpath detection             | likely   | not proven                  | if detectable, dye likely identified in Acrotelm only                                                   | unlikely | not proven                   |
|                          | SSF        | if detectable, slow response (days) in the stream; deep flowpath in the bedrock                 | possible | not proven                  | if detectable, possibly quick response (minutes) in the stream                                          | possible | not proven                   |
| Brilliant Blue (BB)      | -          | suitable tracer for light-colored mineral soils                                                 | likely   | <b>confirmed</b>            | BB is likely a less suitable tracer for dark-colored peaty soils: BB difficult to detect in dark soils. | possible | <b>rejected</b>              |
|                          | -          | identifies vertical flow structures in soil (macropores, matrix)                                | likely   | <b>confirmed</b>            | identifies vertical flow structures (macropores, matrix)                                                | likely   | <b>confirmed</b>             |
|                          | SSF/GWR    | BB identifies lateral flow structures in soil (pipes, matrix)                                   | likely   | <b>confirmed</b>            | dye identifies lateral flow structures (pipes, matrix)                                                  | likely   | <b>confirmed</b>             |
|                          | no GWR     | if detectable, dye likely identified underneath the irrigation plot only                        | likely   | <b>confirmed</b>            | if detectable, dye likely identified in Acrotelm only                                                   | unlikely | <b>confirmed</b>             |
|                          | SSF        | if detectable, dye possibly stains major lateral pathways (soil pipes)                          | possible | <b>confirmed</b>            | if detectable, dye possibly stains major lateral pathways (soil pipes)                                  | possible | <b>confirmed</b>             |

5

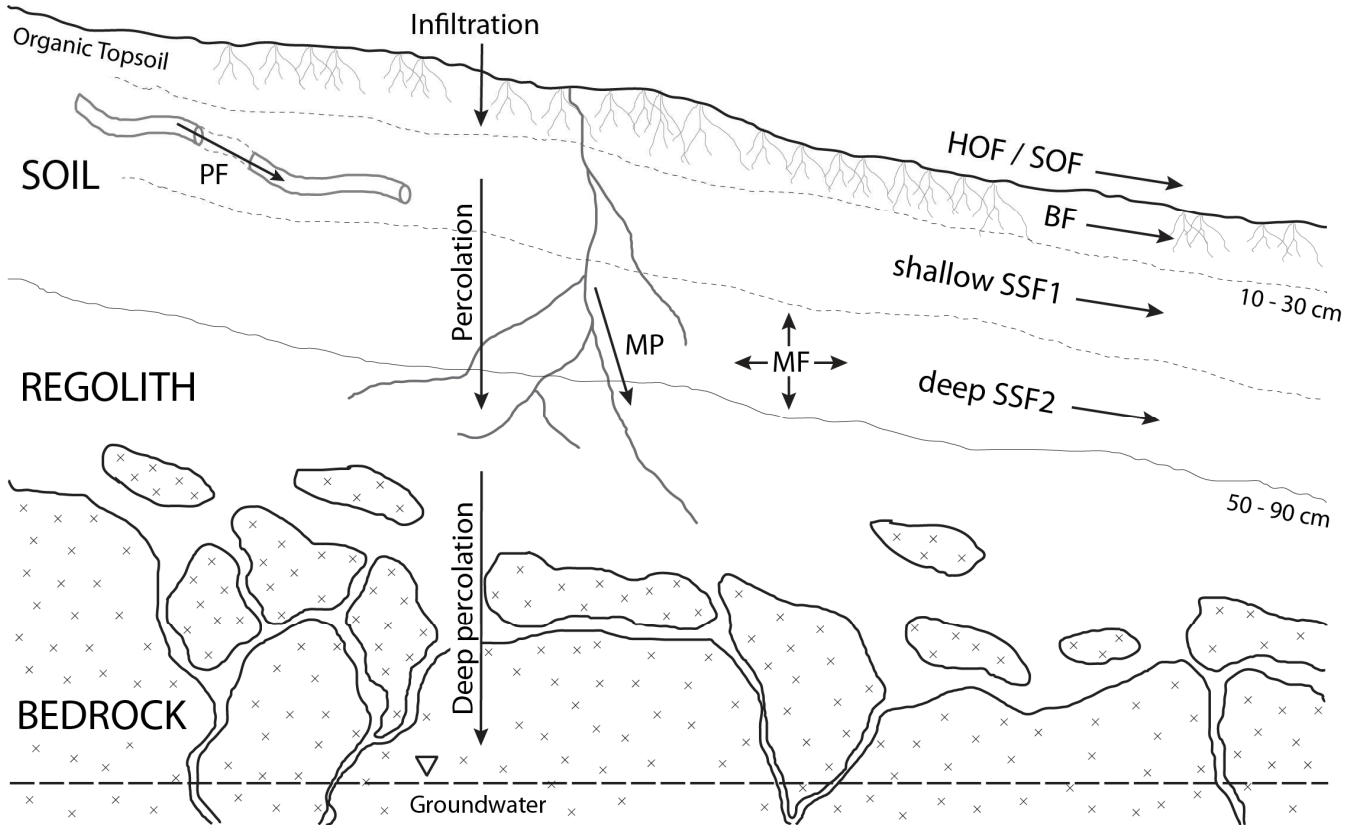

**Fig. S1** Terminology of the runoff formation processes used in the Šumava hillslope hydrology study. HOF = Hortonian overland flow; SOF = Saturation overland flow; BF = Biomat flow; SSF = Subsurface stormflow; PF = Pipeflow (lateral); MP = Macropore flow (vertical); MF = Matrix flow.

10
